# Supplementary material for: Long-Term Outcomes of Transvenous Lead Extraction: A Comparison in Patients with or without Infection from the Italian Region with the Oldest Population
Source: MDPI journal article supplement (doi:10.3390/jcm12134543), 2023-07-07
Supplement: s1 [file s1]

## Supplementary data

**Table S1.** Study population characteristics stratified by diagnosis of local versus systemic infection.

| Variable                                                         | Local Infection (n=67) | Systemic infection (n= 15) | p-value      |
|------------------------------------------------------------------|------------------------|----------------------------|--------------|
| Male sex                                                         | 54 (80.5%)             | 11 (73%)                   | 0.50         |
| Coronary artery disease                                          | 21 (34.4%)             | 5 (35.7%)                  | 1            |
| Heart failure                                                    | 27 (43.5%)             | 6 (43%)                    | 1            |
| Atrial Fibrillation                                              | 21 (34.4%)             | 6 (43%)                    | 0.55         |
| Systemic arterial hypertension                                   | 45 (72.5%)             | 9 (64%)                    | 0.53         |
| Diabetes                                                         | 15 (24.2%)             | 3 (21.4%)                  | 1            |
| Anemia                                                           | 10 (16.4%)             | 7 (46.7%)                  | <b>0.012</b> |
| White blood cells                                                |                        |                            | 0.51         |
| <4500 ( <i>leukopenia</i> )                                      | 22 (36.6%)             | 4 (26.6%)                  |              |
| 4500-9800( <i>normal range</i> )                                 | 32 (53.3%)             | 8 (53.2%)                  |              |
| >9800 ( <i>leukocytosis</i> )                                    | 6 (11.1%)              | 3 (20.2%)                  |              |
| C-reactive protein $\geq 3$ mg/dL                                | 44 (78.5%)             | 13(92.8%)                  | 0.44         |
| Chronic kidney disease                                           | 16 (23.88%)            | 7 (46.67%)                 | 0.13         |
| Left ventricular ejection fraction                               |                        |                            | 0.60         |
| <30%                                                             | 21 (43.8%)             | 4 (30.8%)                  |              |
| 30-50%                                                           | 9 (18.7%)              | 2 (15.4%)                  |              |
| >50%                                                             | 18 (37.5%)             | 7 (53.8%)                  |              |
| Age at extraction, years                                         | 79.7 [11.2]            | 78.7 [12.3]                | 0.91         |
| Number of implants                                               |                        |                            | 0.92         |
| 1                                                                | 26 (59.1%)             | 6 (54.4%)                  |              |
| 2                                                                | 11 (25%)               | 4 (36.6%)                  |              |
| 3                                                                | 5 (11.4%)              | 1 (9%)                     |              |
| 4                                                                | 2 (4.5%)               | 0 (0%)                     |              |
| Older leads, months                                              | 109 [82]               | 112 [76]                   | 0.98         |
| Type of device                                                   |                        |                            | 0.31         |
| <i>Single PM</i>                                                 | 2 (3.1%)               | 1 (6.6%)                   |              |
| <i>Single ICD</i>                                                | 7 (10.8%)              | 2 (13.4%)                  |              |
| <i>Dual PM</i>                                                   | 31 (47.7%)             | 5 (33.3%)                  |              |
| <i>Dual ICD</i>                                                  | 3 (4.6%)               | 3 (20%)                    |              |
| <i>CRT-P</i>                                                     | 9 (13.8%)              | 1 (6.7%)                   |              |
| <i>CRT-D</i>                                                     | 13 (20%)               | 3 (20%)                    |              |
| Coil (yes/no)                                                    | 23 (35.4%)             | 8 (53.3%)                  | 0.24         |
| Coil                                                             |                        |                            | 0.68         |
| <i>Single</i>                                                    | 10 (47.6%)*            | 5 (62.5%)*                 |              |
| <i>Dual</i>                                                      | 11 (52.4%)*            | 3 (37.5%)*                 |              |
| <i>*out of 31 pts implanted with single ICD, dual ICD, CRT-D</i> |                        |                            |              |
| Number of catheters                                              |                        |                            | 0.14         |
| 1                                                                | 8 (12.1%)              | 5 (33.3%)                  |              |
| 2                                                                | 37 (56.1%)             | 7 (46.7%)                  |              |
| 3                                                                | 15 (22.7%)             | 1 (6.7%)                   |              |
| 4                                                                | 6 (9.1%)               | 2 (13.3%)                  |              |
| Number of extracted catheters                                    |                        |                            | 0.17         |
| 1                                                                | 9 (13.6%)              | 5 (33.3%)                  |              |
| 2                                                                | 35 (53%)               | 7 (46.7%)                  |              |
| 3                                                                | 16 (24.4%)             | 1 (6.6%)                   |              |
| 4                                                                | 6 (9%)                 | 2 (13.4%)                  |              |
| Previously abandoned catheter $\geq 1$                           | 10 (17.85%)            | 3 (20%)                    | 0.70         |
| Technique of extraction                                          |                        |                            | 0.53         |
| <i>Traction</i>                                                  | 6 (%)                  | 0 (0%)                     |              |
| <i>Mechanical dilator sheath</i>                                 | 51 (%)                 | 14 (93.3%)                 |              |
| <i>Powered sheath</i>                                            | 9 (%)                  | 1 (6.7%)                   |              |
| Procedure duration, minutes                                      | 127 $\pm$ 45.1         | 115 $\pm$ 57               | 0.38         |

|                    |                            |            |          |      |
|--------------------|----------------------------|------------|----------|------|
| Procedural success |                            |            |          | 0.22 |
|                    | <i>complete</i>            | 60 (89.6%) | 12 (80%) |      |
|                    | <i>clinical</i>            | 3 (4.4%)   | 1 (6.7%) |      |
|                    | <i>surgical extraction</i> | 0 (0%)     | 1 (6.7%) |      |
|                    | <i>procedural failure</i>  | 0 (0%)     | 0 (0%)   |      |
|                    | <i>complications</i>       | 4 (6%)     | 1 (6.7%) |      |
